# Patterns of gene body methylation predict coral fitness in new environments

Groves Dixon<sup>1</sup> Line K. Bay<sup>2,3</sup> Mikhail V. Matz<sup>4</sup>

<sup>1</sup>Institute for Cell and Molecular Biology, University of Texas, Austin, USA

<sup>2</sup>Australian Institute of Marine Science, PMB 3, Townsville, Queensland 4810, Australia

<sup>3</sup>ARC Centre of Excellence for Coral Reef Studies, James Cook University, Townsville, Queensland 4811, Australia

<sup>4</sup>Department of Integrative Biology, University of Texas, Austin, USA

## Abstract

Despite widespread taxonomic representation, the function of gene body methylation remains uncertain. One hypothesis is that GBM mediates phenotypic plasticity. To investigate this hypothesis, we performed whole-genome methylation and transcriptomic assays on reciprocally transplanted colony fragments of the reef-building coral *Acropora millepora*. We found that variation in gene body methylation (GBM) predicted coral fitness following transplantation. Specifically, for transplanted corals, similarity in GBM patterns to native corals positively correlated with growth rate, as well as carbohydrate, protein, lipid and endosymbiont content. Differences in GBM between populations also correlated with differences in transcription, with stronger GBM associated with elevated transcription. Our results further confirm GBM as a signature of stably active transcription and indicate that GBM tracks physiologically important genome-environment interactions.

## Introduction

DNA methylation is a covalent chromatin modification that influences transcription in plants, animals, and fungi. The relative stability of this modification gives it unique potential as an adaptive mechanism. Whereas genetic adaptation must be sculpted by natural selection within populations, DNA methylation can change throughout individual life-histories (1), and in response to environmental stimuli (2). Compared to transcription however, methylation is stable, and has much greater potential for transgenerational inheritance (3,4). DNA methylation therefore represents a middle ground between the rigidity of genotype and the transience of gene expression. These characteristics are the basis for hypotheses that DNA methylation mediates phenotypic plasticity and facilitates adaptation (5-9). Evidence for these hypotheses in marine invertebrates however, remains scarce.

In this study, we investigate the role of DNA methylation in acclimatization. Our study system is the reef-building coral, *Acropora millepora*: a basal metazoan uniquely amenable to ecological

epigenetics because individuals can be fragmented into genetically identical replicates. Understanding acclimatization in this system is also of special importance because of corals' high vulnerability to climate change (10). Using a reciprocal transplantation experiment, we evaluate the role of a particular form of DNA methylation, gene body methylation, as corals acclimatize to novel conditions.

Gene body methylation (GBM) refers to DNA methylation within transcribed regions of coding genes, most often on cytosines within CG dinucleotides (CpGs) (11). Although GBM occurs in both plants and animals (12,13), its adaptive function, if any, remains uncertain. In both plants and animals, GBM correlates with expression level and gene responsiveness (14). Constitutively expressed genes (i.e., housekeeping genes) tend to be strongly methylated and inducible genes tend to be weakly methylated. This association extends to environmentally driven expression (15-17), suggesting that GBM may be involved in modulating phenotypic plasticity (6).

To better understand the role of GBM in phenotypic plasticity, we assayed genome-wide patterns of DNA methylation in coral fragments transplanted to different sites on the Great Barrier Reef. Thirty colonies of *A. millepora* were divided into fragments and reciprocally transplanted between a warmer site near Orpheus Island, and a cooler site near Keppel Island (Fig. 1A-B). In this way, 30 genotypes were simultaneously exposed to distinct natural reef conditions. We refer to corals replaced at their home sites as 'natives' (coded KK and OO samples), and corals placed at the alternative site as 'transplants' (KO and OK samples, with the order of letters representing native then transplanted location)(Fig. 1A). Following a 3-month acclimatization period, tissues were collected from each sample and assayed for gene expression using Tag-seq (18), and DNA methylation using MBD-seq (17). These data were analyzed in the context of fitness-related traits to assess the role of GBM in acclimatization. Specifically, we tested three predictions: 1) GBM changes in response to environmental conditions, 2) GBM co-varies with fitness-related traits, and 3) changes in GBM co-vary with changes in gene expression.

## Results

### *Absolute levels of GBM*

For a subset of 12 samples, we sequenced both the captured and flow-through fractions from the MBD-seq library preparation. Log<sub>2</sub> fold differences between these samples were used to estimate absolute levels of methylation. As shown previously (17), this measure was bimodally distributed across genes and correlated with normalized CpG content (CpGo/e)(Fig 1 D-E). Targeted bisulfite sequencing of 13 loci further confirmed that MBD-seq accurately measures methylation in our system (Fig. 1F).

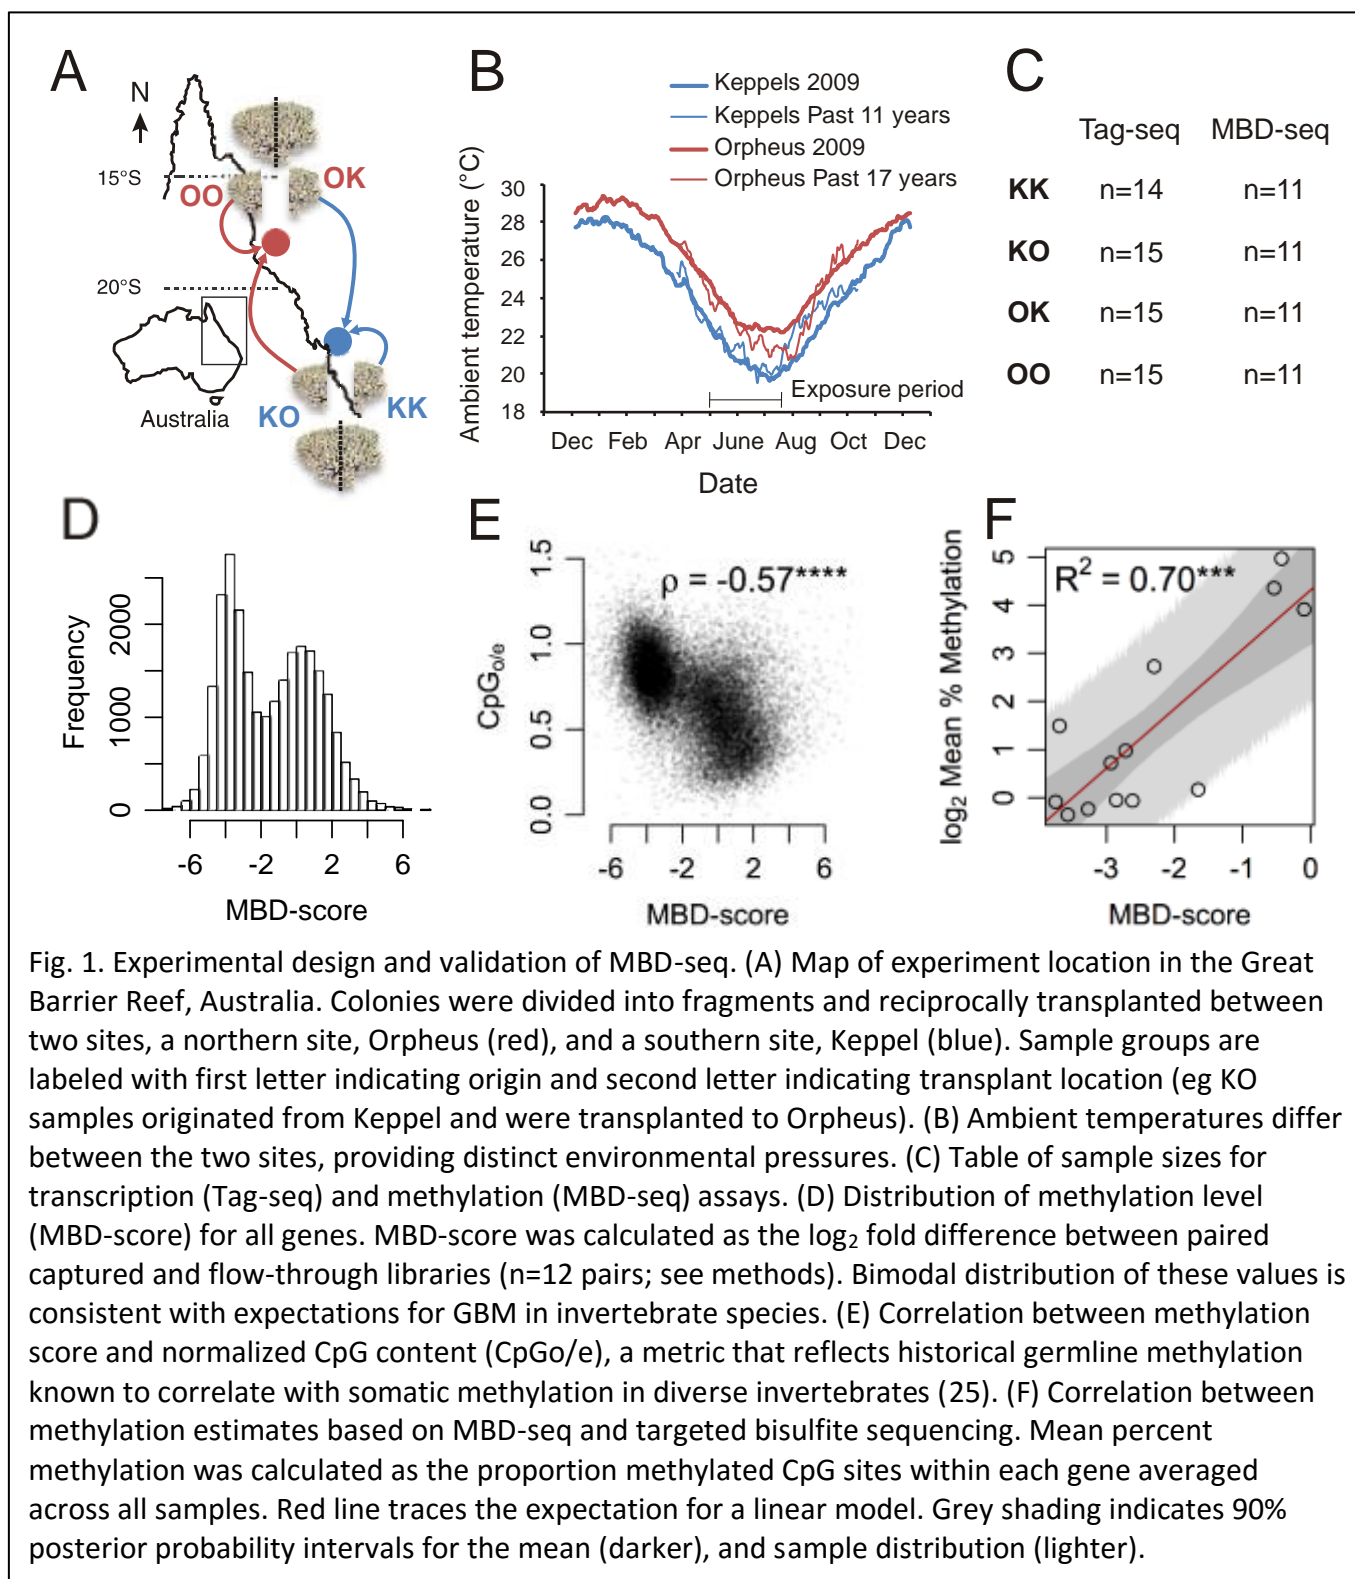

### *GBM and transcription remains highly consistent among fragments of the same colony*

Overall, patterns of GBM showed a strong dependence on colony identity (i.e., genotype). In spite of transplantation, all except one of the 22 clone-pairs showed greatest similarity to one another

(Fig. S1). Similar results were found for transcription (Fig. S2), highlighting the importance of genotype in shaping both methylation and gene expression patterns. Partitioning of variance between colony identity, origin, and transplantation site further confirmed these results, indicating an overwhelming effect of colony identity with only modest effects of origin and transplantation on both GBM and transcription (Fig. 3C,G).

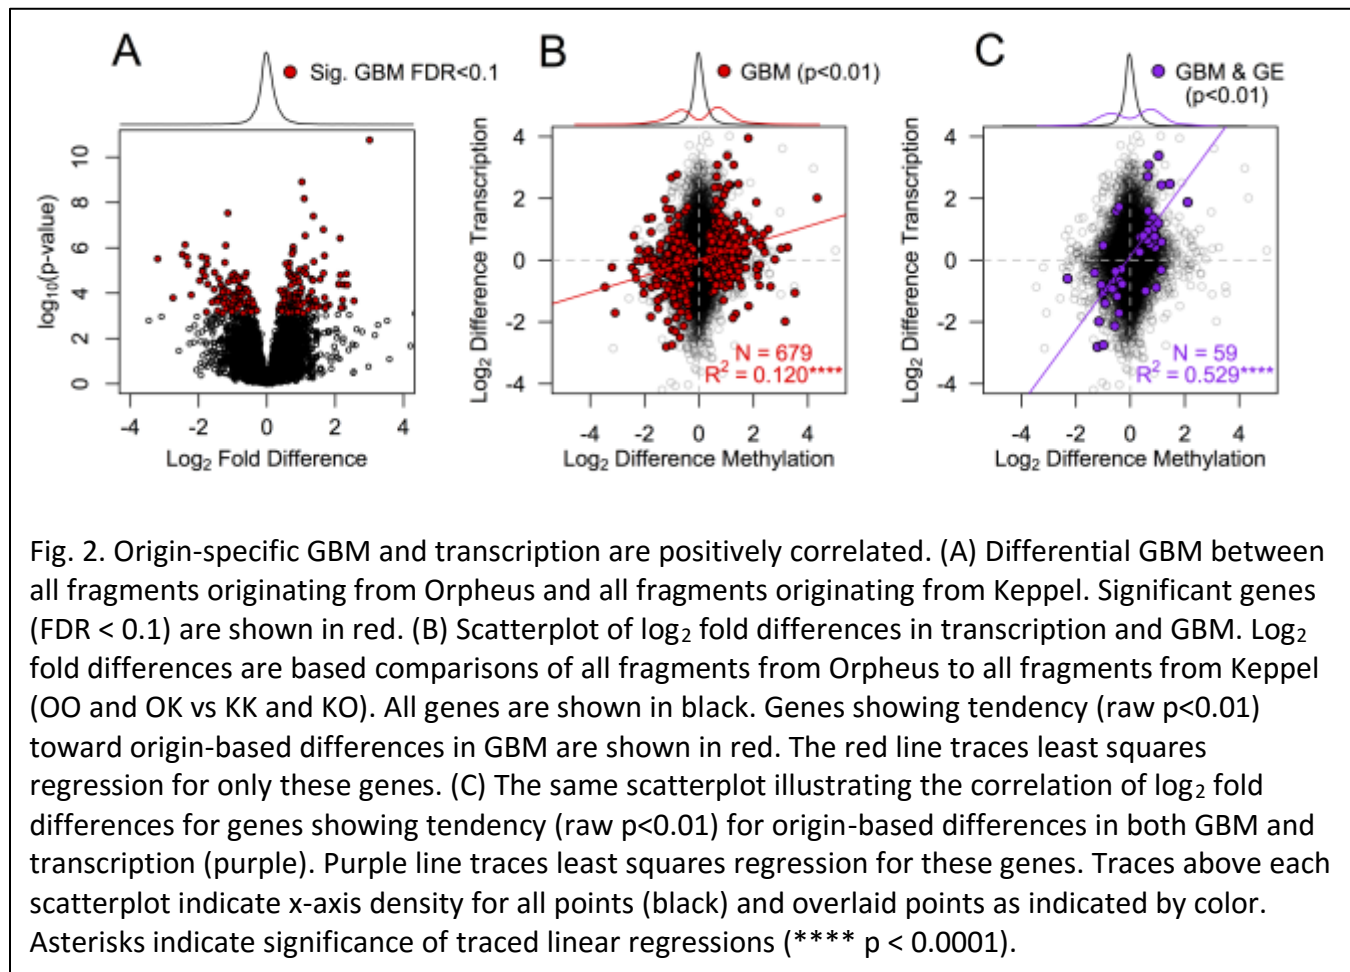

### *GBM linked with stable transcription*

Tests for differences in GBM depending on site of origin (irrespective of the site of transplantation) identified 197 differentially methylated genes (DMGs)(Fig. 2A). Correlations between origin and methylation were validated using targeted bisulfite sequencing (Fig. S3-S4). In terms of absolute methylation level, origin-specific DMGs tended to be intermediately or highly-methylated (Fig. S5). Differential methylation by origin (raw p < 0.01) correlated positively with variation in transcription (Fig. 2B): genes with higher GBM in one population tended to be more highly expressed in that population. This relationship was especially pronounced for genes that also tended toward differential transcription by origin (raw p < 0.01) (Fig. 2C). Moreover, differential GBM between native fragments (OO vs KK) correlated with transcription even among their transplanted clonal counterparts

(OK vs KO) (Fig. S6). Hence population level differences in GBM correlate with canalized transcription differences.

### *GBM patterns predict fitness in novel environments*

The effect of transplantation on GBM was subtle. Although many genes, (2167), showed significant differences in transcription ( $FDR < 0.1$ ), only two genes passed false discovery correction for GBM (Figure 3 A-B, E-F). Validation of transplant effects using targeted bisulfite-seq were not conclusive (Fig. S4B), but differences were generally in the same direction (Fig. S7). In terms of absolute methylation, genes that tended toward site-specific methylation (raw  $P < 0.01$ ) tended to be weakly methylated (Fig. S5). Seventeen of these genes also showed a tendency toward origin-specific methylation.

To better examine these subtle environmental effects, we used discriminate analysis of principal components (DAPC). DAPC is designed to find the axis in multivariate space that best discriminates samples into predefined groups (19). The function that describes this axis can then be applied to values from additional samples to assess their variation in the context of the pre-specified contrast (20). We used DAPC to discriminate between native samples (KK and OO; Fig 1A) based on genes that showed evidence of GBM plasticity ( $n=560$  genes with raw  $p < 0.01$ ; see methods). We then applied the discriminant function to the transplants (Figure 3D). The same analysis was performed using transcriptional data (Fig. 3H), and for SNP data (Fig. S8A). Based on both the number of significant genes ( $FDR < 0.1$ ), and the magnitude of shift along with discriminant axis (Fig. 3), transcription was much more plastic than GBM.

Projection of our transplanted samples onto the discriminant axis allowed us to quantify the extent to which the transplants' GBM patterns matched those of native corals. Initially, we found that daily weight gain correlated with DAPC coordinates, but only of transplanted samples (Fig 4B). The nearly orthogonal relationships for the two transplant groups suggested that greater similarity to native GBM patterns predicted greater fitness. To further investigate this trend, we calculated a 'similarity' value expressing the proximity of each transplant along the discriminant axis to the mean for natives of the site (Fig. 4A; see methods). We regressed these similarity values against each fitness-related trait. Strikingly, five different traits (percent daily weight gain, lipid, carbohydrate, protein and zoxanthellae content) correlated positively with GBM similarity (Fig. S9C-G). The same analyses were performed using transcription data (Fig. S10), and SNP data (Fig. S8), but did not detect significant relationships. To provide a summary index for coral fitness, we took the first principal component (explaining 44% of variation) for four of the fitness proxies (weight gain, lipids, carbohydrates, and protein) among the





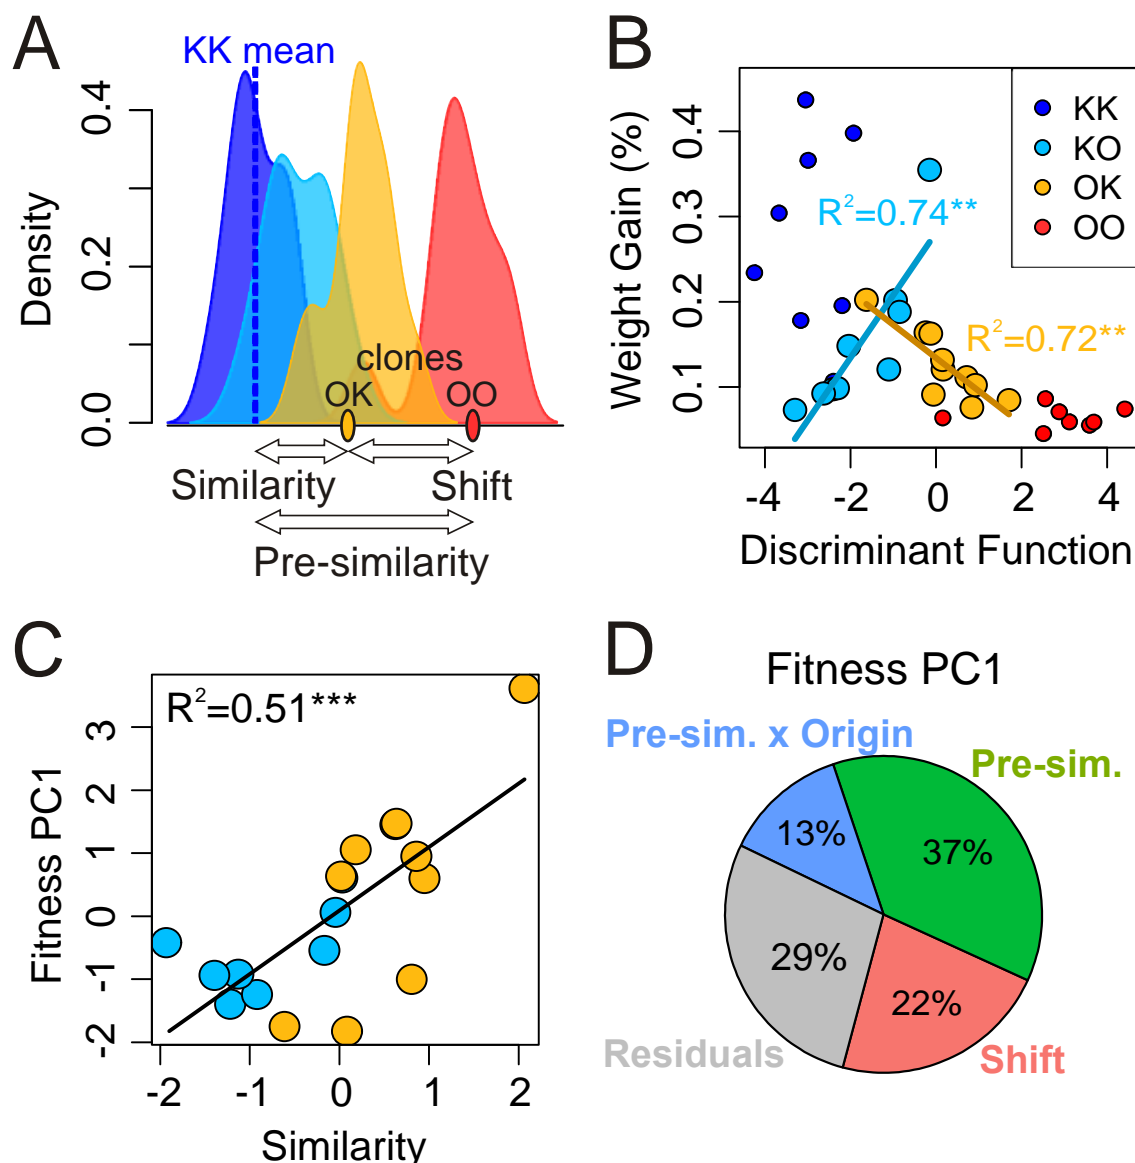

Fig. 4. Correlation between gene body methylation (GBM) and fitness-related traits. (A) Projection of transplanted samples onto the discriminant axis allowed us to quantify their similarity in GBM patterns to natives of the transplant site. Similarity was quantified as the inverse distance of a transplanted sample from the mean value for corals native to the site (arrow labeled 'Similarity'; see methods). This similarity value could be described as two separate components: 'Shift' which describes how much the transplanted sample's GBM patterns shifted from its native clonal counterpart, and 'Pre-Similarity', which describes how similar the genotype already was to the mean for the alternative site (see methods). (B) Scatterplot showing correlation between transplanted samples' discriminant axis coordinates and daily percent weight gain, an important fitness proxy for stony corals. The nearly orthogonal relationships seen for the two transplant groups (blue and golden lines) illustrate how similarity in GBM patterns to natives of their respective transplantation sites was associated with higher growth rate. (C) Correlation between 'Similarity' (as indicated in A) and a summary fitness index: the first principal component (44% of variance explained) for daily weight gain, and lipid, carbohydrate, and protein content. (D) Pie chart showing partitioning of variance among three predictors of the optimal linear model of the fitness index (Pre-Similarity, Shift, and Pre-similarity by Origin interaction).

and its native clone mate. Shift was intended to describe the extent of plastic change in GBM in response to transplantation. Based on AIC, the linear model that included both Pre-Similarity and Shift provided better prediction of fitness than Similarity alone (AIC = 0.75 and 1.87 respectively). Comparing a diversity of linear models, including predictors from the SNP and transcription discriminant axes, we found that the optimal linear model for fitness included Pre-Similarity, Shift, and an interaction between Pre-Similarity and Origin (AIC = -2.05). Of these predictors, Pre-Similarity explained greatest amount of fitness variation (Fig. 4D).

## Discussion

### *GBM is a signature for stable transcription*

Within plant and animal genomes, correlations between GBM and transcription are generally weak (17, 21-23), and evidence that GBM directly regulates transcription in a general context remains scarce (14). Some associations however, are consistent. Across plant and animal taxa, GBM is often bimodally distributed, separating genes into strongly and weakly methylated classes (24-25). In both groups, strongly methylated genes tend toward active transcription across broad cellular, developmental, and ecological contexts, whereas weakly methylated genes tend toward context specificity. Here we show that in a basal metazoan, variation in GBM between populations is predictive of variation in transcription. Genes with elevated GBM in one population tend to show higher transcription in that population, even when the individuals are transplanted to alternative environments. These results further establish GBM as a signature for stable active transcription, and demonstrate that variation in GBM between populations may be of functional importance.

### *GBM and acclimatization*

In response to transplantation, patterns of GBM changed only subtly, were considerably less responsive than transcription, and continued to be predominantly attributable to genotype (broad-sense heritability). Despite this subtle response, analysis of genes showing trends toward GBM plasticity (raw  $p = 0.01$ ) revealed that for transplanted corals, similarity in GBM patterns to native corals positively correlated with fitness-related traits (Fig. 4). It is plausible that, due to either selection or plasticity, GBM patterns of native corals reflect relatively higher fitness to their local conditions. If this is the case, then similarity of GBM patterns could be interpreted as a measure of the degree to which a transplant matched a ‘target’ genomic profile well-suited to the local environment. This similarity could be divided into two components: the degree to which the colony already matched its target (‘Pre-Similarity’; Fig. 4A), and the extent to which its GBM patterns changed during the experiment (‘Shift’; Fig. 4A). Shift



explained roughly 20% of variation in fitness, with roughly 50% explained by Pre-Similarity and Pre-Similarity by Origin interactions (Fig. 4D). Because of the high correlation in GBM patterns between clone mates (Fig. S1-2), we suggest that Pre-Similarity largely reflects genetic diversity, and that Shift is the better measure of GBM plasticity. With this in mind, roughly 20% of fitness variation was explained by GBM plasticity, with an additional 50% by innate GBM variation (Fig. 4D). These results are consistent with previous work on another species of *Acropora* emphasizing the importance of both acclimatization and genetic adaptation for thermal tolerance (26). They further illustrate that comparative methylation assays can shed light on the extent to which corals are pre-adapted for particular environments.

### *Missing mechanism*

While our results demonstrate a clear association between GBM and fitness, the actual mechanism linking these traits remains unclear. The third prediction of our hypothesis was that environmentally induced changes in GBM would co-vary with transcription. Although population-specific GBM and transcription were correlated (Fig. 2), GBM patterns associated with transplantation showed either no correlation, or a *negative* correlation with transcription (Fig S12-13). Hence, in this dataset, the relationship between environmentally dynamic GBM and transcription was qualitatively different from that observed for origin-based differences, and across genes within plant (12) and animal (13) genomes. In short, GBM appears to be positively correlated with stably elevated transcription, but not with plastically elevated transcription. One possible explanation for these observations is that the dynamics of GBM and transcription operate on distinct timescales. We suggest that GBM changes slowly, only in response to sustained changes in transcription. If this is the case, GBM patterns could provide a more integrated picture of transcription across long time periods, in contrast to the temporally localized ‘snapshot’ provided by transcriptomic assays. This could potentially explain the surprising result that GBM similarity predicted fitness (Fig. 4; Fig. S9) when the equivalent measure based on transcription did not (Fig. S10). This explanation is also consistent with the observation that GBM correlates with stable, origin-based transcription (Fig. 2) but not with environmental dynamic transcription (Fig. S12). To clarify, the observed differences in transcription based on transplantation likely included not only responses to conditions *characteristic* of the two sites, but also to transient conditions, such as the weather or components of water quality immediately preceding collection. Such transient conditions could produce acute differences in transcription disproportionate to their actual ecological importance over a 3-month timescale. If, on the other hand, accumulation or depletion of GBM results only from persistent changes in transcription, it would better reflect sustained genome-

environment interactions characteristic of the contrasting environments, and hence showed stronger associations with fitness-related traits. This hypothesis could be tested with time series of concurrent GBM and transcriptomic assays, especially under experimental conditions that cause persistent changes in transcription.

### *Conclusions and outlook*

Here we present four major results using an ecological experiment with a reef-building coral. First, patterns of GBM and transcription depend predominantly on genotype. This result highlights the need to carefully consider genotypic effects in interpretations of ecological transcriptomic and methylomic data. Second, differences in GBM between populations correlated with similar differences in transcription, demonstrating that variation GBM not only correlates with transcriptional activity within genomes, but also between populations. Third, GBM is considerably less plastic than transcription. As a result, large sample population sizes are necessary to detect environmental effects on GBM. Finally, patterns of GBM correlate with coral fitness under ecologically realistic novel conditions. This result demonstrates the potential for methylomics to elucidate complex ecological traits such as local adaptation and acclimatization, possibly with greater precision than transcriptomes or SNPs.

### **Methods**

For full methods, please see supplementary methods file. The reciprocal transplantation experiment was performed as described in (15). Daily weight gain was measured as described in (27). Protein, carbohydrate and lipid content were standardized to coral surface area measured using a twice dip paraffin wax method (28). Protein concentration was quantified in three technical replicates of 50ul of coral protein extract using a microplate Peterson – Lowry assay following the manufacturer’s recommendations (Sigma: TP0300). Carbohydrate content estimates were obtained from the average of three technical replicates of 50 uL coral slurry using D-glucose as a standard (29). Lipids were extracted using a modified version of protocol described in (30) and concentration was determined gravimetrically from dried samples (60°C over night) in pre-weighed acetone washed aluminum trays. *Symbiodinium* cell numbers were determined using homogenized formalin preserved samples from six KI and seven OI source colonies in their native and transplant locations at three time points (n = 75). Enrichment reactions for MBD-seq were performed using the MethylCap kit (Diagenode Cat. No. C02020010). Raw reads were trimmed of non-template sequence using Cutadapt (31) and quality filtered using Fastx toolkit ([http://cancan.cshl.edu/labmembers/gordon/fastx\\_toolkit/](http://cancan.cshl.edu/labmembers/gordon/fastx_toolkit/)). Reads were mapped to the reference genome for *Acropora digitifera* (version 1.1) (32) using Bowtie2 (33). Reads mapping to annotated

coding sequences were counted using HTseq (34). Fold coverage across transcription start sites was assessed using BEDTools (35). Transcription was assayed using Tag-seq (18,36). Tag-seq reads were mapped to the *A. digitifera* reference genome using SHRiMP (37) and counted using HTseq. Normalization and statistical analyses of fold coverage for MBD-seq and Tag-seq were performed with DESeq2 (38). SNPs were called from MBD-seq reads using mpileup (39). DAPC was implemented in the R package adegenet (19). We quantified this similarity for each transplanted sample as the inverse distance between the its loading value and the mean value for natives of the transplantation site (Fig. 4A). Specifically, we took the absolute value of the difference between each transplant's DAPC loading value and the mean value for natives of the transplant site, converted these distances into z-scores, and multiplied the z-scores by -1 so that they reflect proximity to native patterns:

$$Similarity_x = -1 \times (|D_x| - \bar{D})/\sigma$$

Where  $D_x$  is its distance along the discriminant axis from the mean for natives of the site it was transplanted to,  $\bar{D}$  is the mean distance for all transplants, and  $\sigma$  is the standard deviation of distance for all transplants. Validation of MBD-seq was performed using targeted bisulfite sequencing. Quantification of methylation for bisulfite sequencing data was performed using Bismark (40). Unless otherwise noted error bars reflect standard error of the mean. Adjustments for multiple test correction were performed using Benjamini-Hochberg correction (41). Adjusted p - values are reported using 'FDR' (eg FDR < 0.1). In many figures significance is indicated symbolically: (n/s not significant; & p < 0.1; \* p < 0.05; \*\* p < 0.01; \*\*\* p < 0.001; \*\*\*\* p < 0.0001).

## Acknowledgements

Funding for this study was provided by National Science Foundation grant DEB-1054766 to M.V.M. and the grant from the Australian Research Council Center of Excellence for Coral Reef Studies and the Queensland Government to L.K.B. Aspects of the discussion, in particular the differing temporal dynamics of GBM and transcription and the comparison of RNA-seq to a "snapshot" in time, benefitted greatly from personal communications with Manuel Aranda at King Abdullah University of Science and Technology.

## References

1. Law J a, Jacobsen SE (2010) Establishing, maintaining and modifying DNA methylation patterns in plants and animals. *Nat Rev Genet* 11(3):204–220.
2. Feil R, Fraga MF (2011) Epigenetics and the environment: emerging patterns and implications. *Nat Rev Genet* 13(2):97–109.
3. Herman JJ, Sultan SE, Herman JJ (2016) DNA methylation mediates genetic variation for

adaptive transgenerational plasticity.

4. Wang X, Werren JH, Clark AG (2016) Allele-Specific Transcriptome and Methylome Analysis Reveals Stable Inheritance and Cis-Regulation of DNA Methylation in *Nasonia*. *PLOS Biol* 14(7):e1002500.
5. Angers B, Castonguay E, Massicotte R (2010) Environmentally induced phenotypes and DNA methylation: how to deal with unpredictable conditions until the next generation and after. *Mol Ecol* 19(7):1283–95.
6. Roberts SB, Gavery MR (2012) Is there a relationship between DNA methylation and phenotypic plasticity in invertebrates? *Front Physiol* 2(116):1–5.
7. Verhoeven KJF, VonHoldt BM, Sork VL (2016) Epigenetics in ecology and evolution: What we know and what we need to know. *Mol Ecol* 25(8):1631–1638.
8. Putnam HM, Davidson J, Gates RD (2016) Ocean acidification influences DNA methylation and phenotypic plasticity in environmentally susceptible corals. *Integr Comp Biol* 56:E177–E177.
9. Hofmann GE (2017) Ecological Epigenetics in Marine Metazoans. *Front Mar Sci* 4(January):1–7.
10. Hoegh-Guldberg O, et al. (2007) Coral Reefs Under Rapid Climate Change and Ocean Acidification. *Science* (80- ) 318(5857):1737–1742.
11. Suzuki MM, Bird A (2008) DNA methylation landscapes: provocative insights from epigenomics. *Nat Rev Genet* 9(6):465–76.
12. Zilberman D, Gehring M, Tran RK, Ballinger T, Henikoff S (2007) Genome-wide analysis of *Arabidopsis thaliana* DNA methylation uncovers an interdependence between methylation and transcription. *Nat Genet* 39(1):61–69.
13. Zemach A, McDaniel IE, Silva P, Zilberman D (2010) Genome-wide evolutionary analysis of eukaryotic DNA methylation. *Science* (80- ) 328(5980):916–9.
14. Zilberman D (2017) An evolutionary case for functional gene body methylation in plants and animals. *Genome Biol* 18(1):87.
15. Dixon GB, Bay LK, Matz M V (2014) Bimodal signatures of germline methylation are linked with gene expression plasticity in the coral *Acropora millepora*. *BMC Genomics* 15:1109.
16. Dimond JL, Roberts SB (2016) Germline DNA methylation in reef corals: patterns and potential roles in response to environmental change. *Mol Ecol* 25:1895–1904.
17. Dixon G, Bay LK, Matz M V (2016) Evolutionary consequences of DNA methylation in a basal metazoan. *Mol Biol Evol* 33(9):2285–2293.
18. Meyer E, Aglyamova G V, Matz M V (2011) Profiling gene expression responses of coral larvae (*Acropora millepora*) to elevated temperature and settlement inducers using a novel RNA-Seq procedure. *Mol Ecol* 20(17):3599–616.
19. Jombart T, Devillard S, Balloux F (2010) Discriminant analysis of principal components: a new method for the analysis of genetically structured populations. *BMC Genet* 11(1):94.
20. Kenkel C, Matz M V (2016) Enhanced gene expression plasticity as a mechanism of adaptation to a variable environment in a reef-building coral. *Nat Ecol Evol* 1:14.
21. Zhang X, et al. (2006) Genome-wide High-Resolution Mapping and Functional Analysis of DNA Methylation in *Arabidopsis*. *Cell* 126(6):1189–1201.
22. Ball MP, et al. (2009) Targeted and genome-scale strategies reveal gene-body methylation signatures in human cells. *Nat Biotechnol* 27(4):361–8.
23. Wang X, et al. (2014) Genome-wide and single-base resolution DNA methylomes of the Pacific oyster *Crassostrea gigas* provide insight into the evolution of invertebrate CpG methylation. *BMC Genomics* 15(1119). doi:10.1186/1471-2164-15-1119.
24. Takuno S, Gaut BS (2012) Body-methylated genes in *Arabidopsis thaliana* are functionally important and evolve slowly. *Mol Biol Evol* 29(1):219–227.
25. Sarda S, Zeng J, Hunt BG, Yi S V. (2012) The evolution of invertebrate gene body methylation. *Mol Biol Evol* 29(8):1907–1916.

26. Palumbi SR, Barshis DJ, Traylor-Knowles N, Bay RA (2014) Mechanisms of Reef Coral Resistance to Future Climate Change. *Science* (80- ) 344(6186):895–898.
27. Jokiel P, Maragos J, Franzisket L (1978) Coral growth: buoyant weight technique. *Coral Reefs: Research Methods*, eds Stoddart DR, Johannes RE (UNESCO, Paris), pp 529–542. 5th Ed.
28. Stimson J, Kinzie RA (1991) The temporal pattern and rate of release of zooxanthellae from the reef coral *Pocillopora damicornis* (Linnaeus) under nitrogen-enrichment and control conditions. *J Exp Mar Bio Ecol* 153(1):63–74.
29. Masuko T, et al. (2005) Carbohydrate analysis by a phenol-sulfuric acid method in microplate format. *Anal Biochem* 339(1):69–72.
30. Harland AD, Navarro JC, Spencer Davies P, Fixter LM (1993) Lipids of some Caribbean and Red Sea corals: total lipid, wax esters, triglycerides and fatty acids. *Mar Biol* 117(1):113–117.
31. Martin M (2011) Cutadapt removes adapter sequences from high-throughput sequencing reads. *EMBnetjournal* 17(1):10–12.
32. Shinzato C, et al. (2011) Using the *Acropora digitifera* genome to understand coral responses to environmental change. *Nature* 476(7360):320–3.
33. Langmead B, Salzberg SL (2012) Fast gapped-read alignment with Bowtie 2. *Nat Methods* 9(4):357–9.
34. Anders S, Pyl PT, Huber W (2015) HTSeq-A Python framework to work with high-throughput sequencing data. *Bioinformatics* 31(2):166–169.
35. Quinlan AR, Hall IM (2010) BEDTools: A flexible suite of utilities for comparing genomic features. *Bioinformatics* 26(6):841–842.
36. Lohman BK, Weber JN, Bolnick DI (2016) Evaluation of TagSeq, a reliable low-cost alternative for RNAseq. *Mol Ecol Resour* 16(6):1315–1321.
37. Rumble SM, et al. (2009) SHRiMP: Accurate mapping of short color-space reads. *PLoS Comput Biol* 5(5):1–11.
38. Love MI, Huber W, Anders S (2014) Moderated estimation of fold change and dispersion for RNA-Seq data with DESeq2. *Genome Biol* 15(550):1–21.
39. Li H, et al. (2009) The Sequence Alignment/Map format and SAMtools. *Bioinformatics* 25(16):2078–2079.
40. Krueger F, Andrews SR (2011) Bismark: A flexible aligner and methylation caller for Bisulfite-Seq applications. *Bioinformatics* 27(11):1571–1572.
41. Benjamini Y, Hochberg Y (1995) Controlling the False Discovery Rate: a Practical and Powerful Approach to Multiple Testing. *J R Stat Soc* 57(1):289–300.

**A**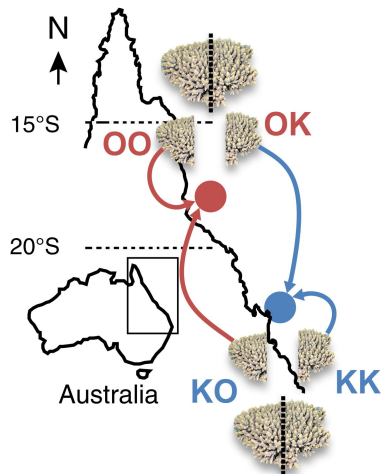**B**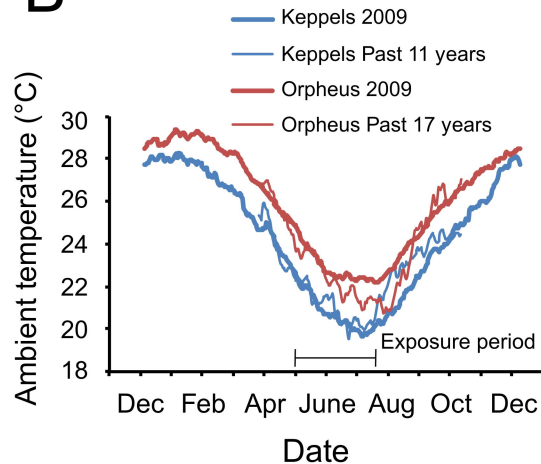**C**

|           | Tag-seq | MBD-seq |
|-----------|---------|---------|
| <b>KK</b> | n=14    | n=11    |
| <b>KO</b> | n=15    | n=11    |
| <b>OK</b> | n=15    | n=11    |
| <b>OO</b> | n=15    | n=11    |

**D**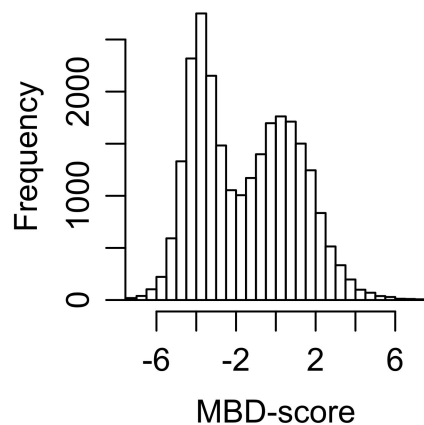**E**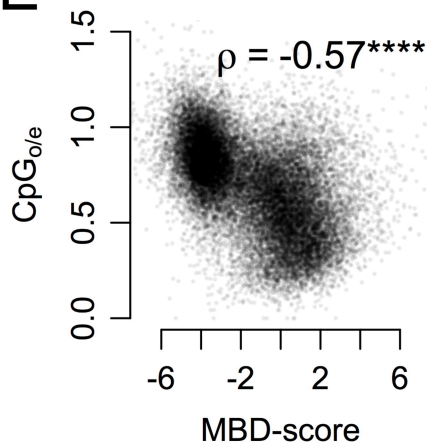**F**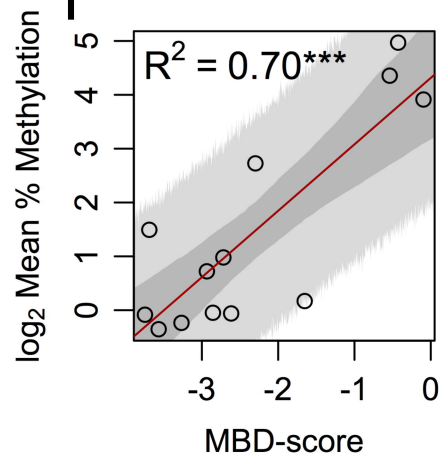



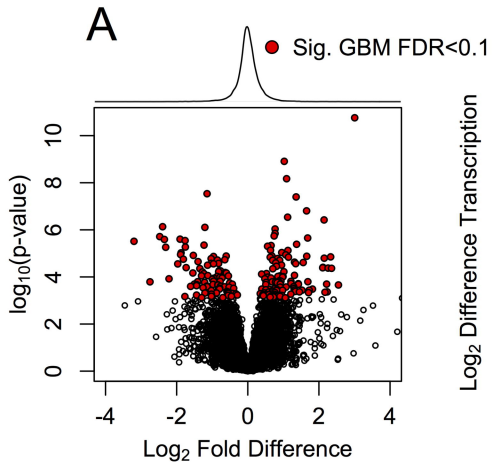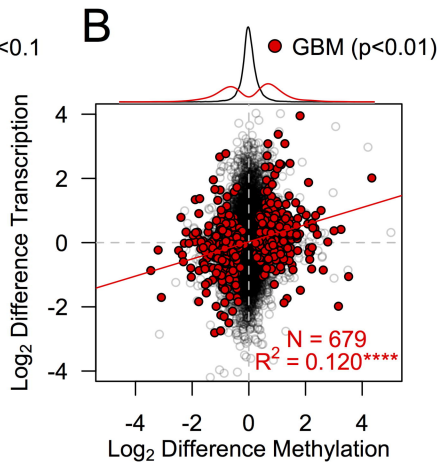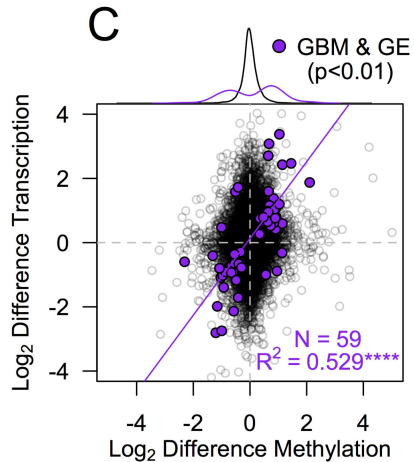

# Gene Body Methylation

**A**

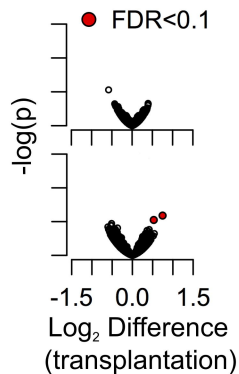

**B**

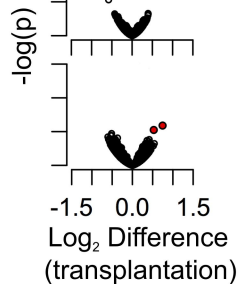

**C**

Variation Explained

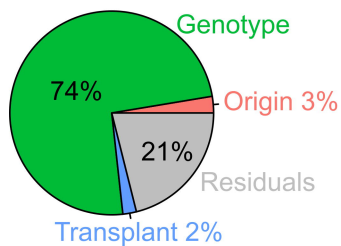

**D**

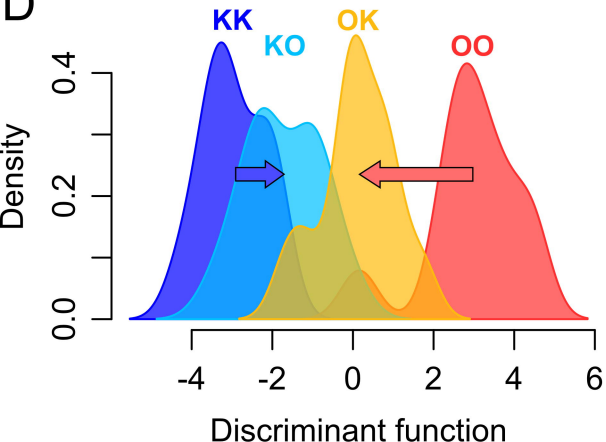

# Transcription

**E**

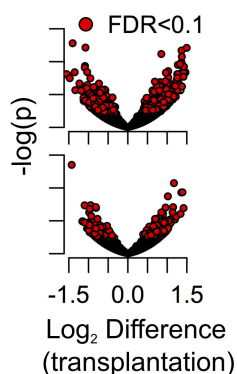

**F**

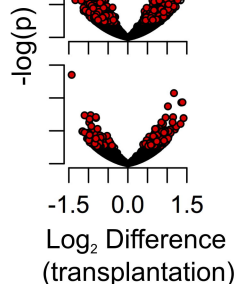

**G**

Variation Explained

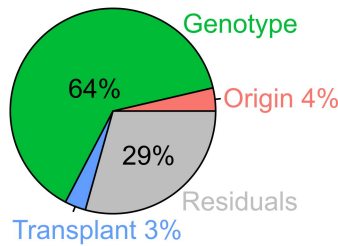

**H**

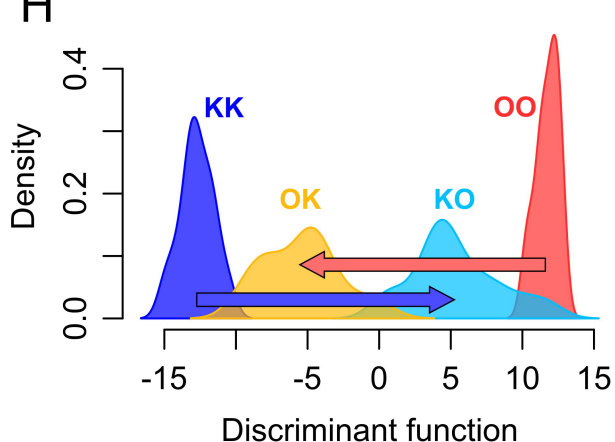

**A**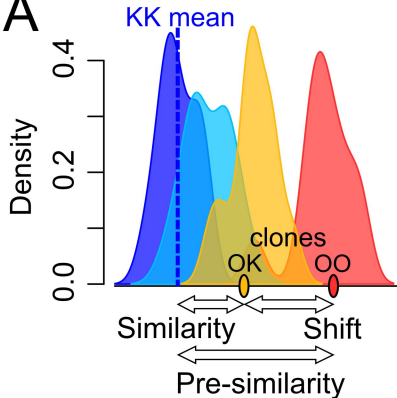**B**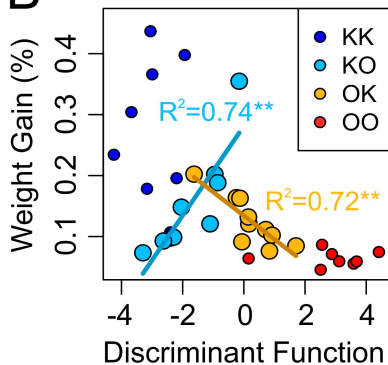**C**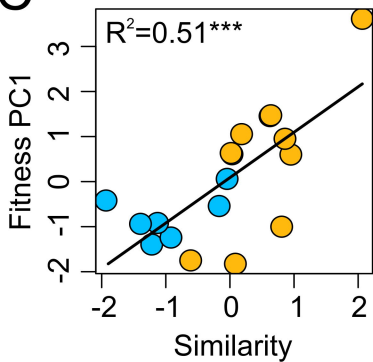**D**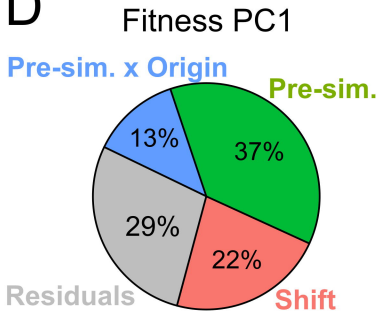

Source: https://www.biorxiv.org/content/10.1101/184457v1.full.pdf
